# Supplementary material
Source: HighWire-hosted journal article supplement (https://erj.ersjournals.com/content/57/1/2004455)
Supplement: inline-supplementary-material-1 [file inline-supplementary-material-1.pdf]

## Appendix E1.

**Table E1. Recommendations for pulmonary hypertension expert referral centers**

| Recommendations                                                                                                                                                                                                                                  | Class <sup>a</sup> | Level <sup>b</sup> |
|--------------------------------------------------------------------------------------------------------------------------------------------------------------------------------------------------------------------------------------------------|--------------------|--------------------|
| It is recommended for referral centers to provide care by a multiprofessional team (cardiology and respiratory medicine physicians, clinical nurse specialist, radiologists, psychologic and social work support, appropriate on-call expertise) | I                  | C                  |
| It is recommended for referral centers to have direct links and quick referral patterns to other services (such as CTD, family planning, PEA, lung transplantation, adult congenital heart disease)                                              | I                  | C                  |
| It should be considered that a referral center follow at least 50 patients with PAH or CTEPH and should receive at least two new referrals per month with documented PAH or CTEPH                                                                | Ila                | C                  |
| It should be considered that a referral center perform at least 20 vasoreactivity tests in IPAH, HPAH or DPAH patients per year                                                                                                                  | Ila                | C                  |
| Referral centers should participate in collaborative clinical research in PAH, including phase II and phase III clinical trials                                                                                                                  | Ila                | C                  |

Reprinted, with permission, from reference 7. CTD: connective tissue disease; CTEPH: chronic thromboembolic pulmonary hypertension; DPAH: drug-induced pulmonary arterial hypertension; HPAH: heritable pulmonary arterial hypertension; IPAH: idiopathic pulmonary arterial hypertension; PAH: pulmonary arterial hypertension; PEA: pulmonary endarterectomy.

<sup>a</sup>Class of recommendation.

<sup>b</sup>Level of evidence.

**Table E2. MRI biomarkers found to be predictive of survival in patients with pulmonary hypertension**

| First Author (year published) (reference) | Cohort Size (n) | CMR metric | Hazard Ratio | Hazard Ratio 95%C.I. | P value | Analysis      | Cutoff (Kaplan-Meier)  |
|-------------------------------------------|-----------------|------------|--------------|----------------------|---------|---------------|------------------------|
| Gan (2007) (73)                           | 70              | PA RAC     | 0.87         | 0.79–0.96            | 0.006   | univariate    | 16%>                   |
| van Wolferen (2007) (74)                  | 64              | SVI        | 0.764        |                      | <0.001  | multivariate  | 25 mL/m <sup>2</sup> > |
|                                           |                 | RVEDVI     | 1.61         |                      | <0.001  |               | 84 mL/m <sup>2</sup> < |
|                                           |                 | LVEDVI     | 0.705        |                      | 0.002   |               | 40 mL/ms >             |
| van de Veerdonk (2011) (75)               | 110             | RVESVI     | 1.014        | 1.001–1.027          | 0.048   | univariate    |                        |
|                                           |                 | RVEF       | 0.938        | 0.902–0.975          | 0.001   |               | 35%>                   |
|                                           |                 | LVEDVI     | 0.962        | 0.931–0.994          | 0.019   |               |                        |
|                                           |                 | LVESVI     | 0.942        | 0.888–0.998          | 0.045   |               |                        |
|                                           |                 | SVI        | 0.945        | 0.899–0.993          | 0.025   |               |                        |
| Freed (2012) (76)                         | 58              | RVEF       | 0.91         | 0.83–0.99            | 0.036   | multivariate  | 39%>                   |
| Yamada (2012) (77)                        | 41              | RVEDVI     | 1.03         | 1.00–1.05            | 0.02    | multivariate  |                        |
| Baggen (2016) (78)                        | 539             | RVEF       | 1.23         | 1.07–1.41            | 0.003   | meta-analysis |                        |
|                                           |                 | RVEDVI     | 1.06         | 1.00–1.12            | 0.049   |               |                        |
|                                           |                 | RVESVI     | 1.05         | 1.01–1.09            | 0.013   |               |                        |
|                                           |                 | LVEDVI     | 1.16         | 1.00–1.34            | 0.045   |               |                        |
| de Siqueira (2016) (79)                   | 110             | GLS        | 1.06         | 1–1.12               | 0.026   | multivariate  | –17%<                  |
|                                           |                 | RVEF       | 0.97         | 0.94–0.99            | 0.03    |               |                        |
|                                           |                 | GLSR       | 2.52         | 1.03–6.1             | 0.04    |               | –1.1 S <sup>–1</sup> < |
|                                           |                 | GCSR       | 4.5          | 1.3–15.6             | 0.01    |               | –0.8S <sup>–1</sup> <  |
| Swift (2017) (80)                         | 576             | RVESV      | 1.217        | 1.061–1.539          | 0.005   | multivariate  | 180 mL >               |
|                                           |                 | PA RAC     | 0.762        | 0.623–0.932          | 0.008   |               |                        |

Abbreviations: CMR = cardiac magnetic resonance imaging; C.I.= Confidence interval; PA RAC = pulmonary artery relative area change; SVI = stroke volume index; RVEDVI = right ventricular end-diastolic volume index; LVEDVI = left ventricular end-diastolic volume index; RVESVI = right ventricular end-systolic volume index; RVEF = right ventricular ejection fraction; LVESVI = left ventricular end-systolic volume index; RVESV = right ventricular end-diastolic volume; LVSV = left ventricular stroke volume; FWHM = full width at half maximum; PTT = pulmonary transit time; GLS = global longitudinal strain; GLSR = global longitudinal strain rate; GCSR = global circumferential strain rate.

## **Appendix E2: Methods**

We excluded studies using either transthoracic or transesophageal echocardiography to define PH. Comprehensive and systematic literature search strategies were designed for each question using medical subject headings and text words. Searches were limited to English for 2008 through August 2018 in MEDLINE, Embase, and Cochrane Central Register of Controlled Trials (CCTR) and Health Technology Assessment (HTA).

One committee member (MRJ) conducted a prescreening of the initial search results, removing duplicate citations and publications unrelated to PH. A lead author was identified for each key question, who was responsible for assessing eligibility criteria for all publication titles that passed the prescreening assessment. In two distinct stages, two committee members then independently reviewed the abstracts and full-text articles to identify publications relevant to each key question. Eligibility criteria included original research using any study design, a sample size of <sup>3</sup> 10 adults with PH confirmed by right heart catheterization (RHC), and publication in English. A brief narrative summary was created for each eligible article as it related to each key question, which was then provided to the working group to support writing and referencing of the final position paper. A formal quality of evidence assessment was not performed given the heterogeneity of study design and the fact that some of the identified literature did not pertain to the key questions. Important articles published before and after the date range of this original search were referenced where appropriate, but these were not part of the formal systematic review. Search strategies are available in Appendix E7. The initial search identified 5163, 4737, 5163, 5288, 1390 and 2123 publications for each of the six key questions, respectively. From these, 388 unique publications met the eligibility criteria and were relevant to at least one key question. The working group reviewed these publications and used them to support creation of the final document.

## **Appendix E3: Practical Considerations for Assessing PH in the Clinic**

The symptoms of PH are nonspecific (including exertional dyspnea, fatigue, weakness, chest pain, light-headedness/syncope). Progressive right-sided heart failure (characterized by edema, ascites, abdominal distension) tends to occur later in the course of the disease. Rarely, hemoptysis, Ortner's syndrome/hoarseness (left-sided vocal cord paralysis) and arrhythmias may occur. Physical findings include jugular venous distension, hepatomegaly, hepato-jugular reflux, right ventricular lift, ascites, edema, tricuspid regurgitation or pulmonary regurgitation murmurs, loud second heart sound and S3 gallop. ECG may show abnormalities compatible with PH such as right bundle branch block or right axis deviation (but a normal ECG does not exclude PH). As a general rule, patients presenting with unexplained shortness of breath should be further evaluated, in particular by echocardiography, to investigate the probability of PH. The pretest probability is higher in patients with conditions known to be associated with PH such as connective tissue disease (typically systemic sclerosis, mixed connective tissue disease and systemic lupus erythematosus), portal hypertension and HIV infection. The same applies for CTEPH, a severe form of PH affecting 1 to 3% of acute pulmonary embolism (PE) survivors. In that setting, persistent dyspnea and functional limitation following an episode of acute PE should raise the suspicion of CTEPH and prompt specific assessment.

The development of precapillary PH is common in parenchymal lung diseases and associated with aggravated symptoms and poor outcomes. Symptoms and physical signs of PH may be difficult to identify in patients with respiratory disorders. The PH diagnostic approach is

multidisciplinary with an emphasis on the clinical probability of PH and the detection of imaging characteristics suggesting PH, prompting the decision to perform echocardiography followed by RHC when appropriate, ie, when therapeutic benefit is anticipated. As a general rule, patients presenting with symptoms that are more severe than expected based on their pulmonary function test results should be further evaluated, in particular by echocardiography, to search for concomitant left heart disease and/or PH. In addition, all respiratory diseases for which lung transplantation is considered should have a meticulous evaluation of possible comorbid PH. In this context, PH may be clinically suspected if there is persistent dyspnea despite adequate therapy of the respiratory condition and/or clinical signs of right heart failure. Clinical judgement is critical to assess the likelihood of PH in patients with comorbid respiratory diseases. In this setting, the probability of PH is higher if there is (i) persistent decline in 6-minute walk distance with marked oxygen desaturation at exercise and/or decline in diffusing lung capacity for carbon monoxide (DLCO)/carbon monoxide transfer coefficient (KCO) without modification of lung function tests; (ii) an increased oxygen requirements in the course of the disease; (iii) elevation of brain natriuretic peptide (BNP) or *N*-terminal probrain natriuretic peptide (proBNP); (iv) the ECG shows abnormalities compatible with PH. CT measures of PA and right-heart chambers may increase the likelihood of PH and further support to the need for echocardiography (Fig E1). While increased PA diameter should alert to the possibility of PH, a normal PA diameter does not exclude PH (Fig E2).

## **Appendix E4: Diagnostic Approach to PH: An Evolving Schema**

The diagnostic approach to PH is a multiparametric consideration. In service to the patient and financial considerations, the use of multiple imaging modalities should be minimized. This is best accomplished by informed physicians who can recommend the most efficient and effective sequence for diagnostic testing. The diagnostic strategy will depend on the degree of suspicion for PH. When PH has not been recognized, the patient is usually referred for the evaluation of nonpecific symptoms (ie, unexplained dyspnea). The first-line imaging test is often a noncontrast chest CT examination; a frequent alternative is chest CTA for a comprehensive analysis of cardiopulmonary structures, both obtained with thin (< 1 mm) sections. When PH is suspected with high probability at echocardiography or has already been confirmed by RHC, two approaches may be considered. The traditional approach follows current recommendations with a central role for V/Q scintigraphy (CTEPH versus non-CTEPH patients), followed by CTA in CTEPH patients (Group 4 PH) or noncontrast CT for other etiologies (ie, group 1, group 3, group 5 PH). An alternative approach implemented in some centers (8,71,72) is to condense the evaluation by replacing V/Q scintigraphy with a single-energy CT angiogram. When available, dual-energy CT augments morphologic information with perfusion, but more evidence regarding the utility of dual-energy CT derived perfusion is needed, especially in the challenging cases such as distal CTEPH. Although the lack of ionizing radiation makes MR an interesting diagnostic method, limited availability and higher costs currently preclude the use of MR in the diagnosis of CTEPH unless iodinated contrast material is contraindicated.

## **Appendix E5: What Are the Perspectives in the Field of Imaging of Pulmonary Hypertension?**

### **1. Early Diagnosis of PH**

In a recent study, Bergemann et al reported high levels of activity and frequent contacts with health care services in the three years before a confirmed diagnosis of iPAH (139). In addition, patients frequently sought attention from respiratory and cardiology specialists. The combination of high levels of activity and the richness of specialty interactions raises the possibility that patients with iPAH may exhibit characteristic patterns of behavior separate from other cardiorespiratory conditions, providing sufficient data to support the development of a predictive diagnostic algorithm for iPAH. The authors are currently engaged in a big-data approach, utilizing a model based on artificial intelligence to develop a predictive algorithm to screen for patients with undiagnosed iPAH in the general population. It remains to be seen how and where imaging may complement early PH detection programs.

### **2. Noninvasive Pulmonary Artery Pressure Assessment**

Current methods to assess PH rely on indirect consequences of raised pulmonary vascular resistance at the level of the right ventricle and proximal pulmonary artery while morphologic assessment of small vascular sections on unenhanced CT can also play a role as described in COPD. Increasing implementation of 4D flow analysis allows for the noninvasive assessment of flow through the pulmonary artery, where the presence of vortices and duration of vortices has been shown to be diagnostic for PH (41). This application is an active focus in MR development. High diagnostic accuracy has been shown for pulmonary arterial hypertension based on a tensor-based machine learning approach (140). Combined automated 3D volumetry of the central pulmonary arteries by pulmonary CT angiography and echocardiographic pressure estimate has recently been reported as an interesting approach to predict the presence of pulmonary hypertension (141). Machine learning by using cardiac MRI could also be used as a tool to guide patient management (142).

### **3. Detection of Small-Vessel Vasculopathy**

Alterations of lung microcirculation can be depicted morphologically on HRCT lung images (eg, in the context of PVOD) or estimated on the basis of perfusion defects on perfusion scintigraphy, dual-energy or MR perfusion images. However, none of these techniques can provide fine analysis of the most distal compartment of the pulmonary circulation, and thus prevent imaging from participating in the confident depiction of diagnostic (eg, PAH) or prognostic (eg, microvasculopathy in CTEPH) features.

Technological developments such as photon counting CT as well as machine-learning approaches should open new possibilities in the analysis of distal parts of the pulmonary circulation.

### **4. Automated Depiction of Vascular Changes in CTEPH**

CTEPH assessment is challenging at several steps. It is sometimes difficult to depict features of chronic PE on CT, which can be responsible for a long delay in diagnosis. The pretherapeutic assessment of CTEPH requires a meticulous and time-consuming analysis of arterial branches

for proper description of all abnormalities that will be shared with the surgeon for therapeutic accessibility. In both situations, an automated approach to analyzing CTEPH morphologic features and a simplified view of the arterial tree could be particularly helpful.

## **Appendix E6: Key Messages**

### **Question No. 1: “Is Noninvasive Imaging Capable of Identifying Pulmonary Hypertension?”**

- PA diameter cannot be used as a stand-alone criterion for PH
- A normal PA diameter does not exclude PH
- Increased PA diameters should alert to the possibility of PH in the context of:
  - normal lung parenchyma
  - mild features of lung infiltration (ILD) or bronchopulmonary changes (COPD)
  - persistent dyspnea and/or functional decline after acute pulmonary embolism
  - patients with a high pre-CT probability of PH
- When PH is already highly suspected by echo or confirmed by RHC, PA measurements are not clinically relevant, except in presence of PA aneurysmal dilatation (> 40 mm).

### **Question No. 2: “What Is the Role of Imaging in Establishing the Cause of Pulmonary Hypertension?”**

- Per current guidelines, V/Q lung scan is the recommended investigation in PH patients to rule out CTEPH.
- Single-energy CT can provide diagnostic information on PH etiology and should play a more important role in the diagnostic strategy.
- Dual-energy CT combines morphologic information with lung perfusion (ie, iodine maps) which has the potential of increasing CT diagnostic capabilities.
- MR is not a first-line diagnostic imaging modality but can provide complementary information to echocardiography and CT.

### **Question No. 3: “How Does Imaging Determine the Severity and Complications of Pulmonary Hypertension?”**

- CMR can track the longitudinal changes of ventricular function after therapy for PH.
- CMR metrics of ventricular function are predictive of survival in patients with PH.
- Coronary artery CT angiography may demonstrate flow-limiting left main coronary artery compression in PH patients

**Question No. 4: “How Should Imaging Be Used to Assess Chronic Thromboembolic Pulmonary Hypertension before Treatment?”**

- Individualized approach to CTEPH treatment with different strategies (surgical, medical and/or interventional) should be discussed in experienced institutions with multidisciplinary teams.
- Besides lifelong anticoagulation, pulmonary endarterectomy is the treatment of choice in patients with proximal obstructing lesions; for inoperable cases, medical therapy is recommended with or without balloon pulmonary angioplasty.
- Digital subtraction angiography, previously considered as the gold standard, has been largely replaced by noninvasive modalities; CT angiography can be used for assessment of operability and balloon pulmonary angioplasty.
- With advances in distal pulmonary endarterectomy and balloon pulmonary angioplasty, and a more general focus on more distal vascular assessment, selective segmental angiography, cone-beam CT and ECG-gated CT may also be considered for precise delineation of distal pulmonary vessels.

**Question No. 5: “Should Imaging Be Performed after Treatment of Pulmonary Hypertension?”**

- Patients with CTEPH who have undergone PEA and are asymptomatic with normalized or near normalized pulmonary hemodynamics do not require follow-up imaging.
- In patients with CTEPH who remained symptomatic with residual PH after PEA, the key question is whether residual pulmonary vascular occlusions are amenable to BPA; conventional DSA or cone-beam CT are the most widely used techniques to address this question.
- MRI is increasingly being used to assess cardiac function and regional lung perfusion in patients with CTEPH before and after therapy.
- Cardiac MRI has become the gold standard to determine RV function in patients with PH of various etiologies and several MRI-derived variables, such as RVEF, provide independent prognostic information.

## Appendix E7: Search Strategy

**Table E3. Systematic review search strategy overview**

| Question | Search strategy overview                           |
|----------|----------------------------------------------------|
| 1        | PH & (CT or MRI)                                   |
| 2        | PH & (CT or scintigraphy) & (CTEPH or PVOD or PCH) |
| 3a       | PH & (CT or MRI)                                   |
| 3b       | PH & (CT or MRI or scintigraphy)                   |
| 4        | CTEPH & (CT or MRI or pulmonary angiography)       |
| 5        | CTEPH & (surgery or balloon pulmonary angioplasty) |

Abbreviations: CT: computed tomography; CTEPH: chronic thromboembolic pulmonary hypertension; MRI: magnetic resonance imaging; PCH: pulmonary capillary hemangiomatosis; PH: pulmonary hypertension; PVOD: pulmonary veno-occlusive disease.

**Table E4. MEDLINE search strategy for question 1**

| Question 1: Is noninvasive imaging capable of identifying pulmonary hypertension? |                                                                                                                                                                                                                |                  |
|-----------------------------------------------------------------------------------|----------------------------------------------------------------------------------------------------------------------------------------------------------------------------------------------------------------|------------------|
| Row                                                                               | Search terms                                                                                                                                                                                                   | Number citations |
| 1                                                                                 | hypertension, pulmonary/or familial primary pulmonary hypertension/                                                                                                                                            | 31804            |
| 2                                                                                 | ((pulmonary or lung) adj3 hypertensi\$).mp.                                                                                                                                                                    | 48785            |
| 3                                                                                 | (pulmonary adj2 (heart or vascular or arter\$ or cardiac) adj2 disease\$).mp.                                                                                                                                  | 9773             |
| 4                                                                                 | (corpulmonale or cor pulmonale).mp.                                                                                                                                                                            | 4020             |
| 5                                                                                 | 1 or 2 or 3 or 4                                                                                                                                                                                               | 55766            |
| 6                                                                                 | magnetic resonance imaging/or diffusion magnetic resonance imaging/or echo-planar imaging/or <sup>19</sup> F magnetic resonance imaging/or magnetic resonance angiography/or magnetic resonance imaging, cine/ | 396478           |
| 7                                                                                 | (MRI or MRIs or (magnet\$ adj2 (transfer or resonance) adj2 (tomogra\$ or imag\$ or angiogra\$)) or ((MR or NMR) adj imag\$)).mp.                                                                              | 528834           |
| 8                                                                                 | (echo adj2 (planar or spin) adj2 imag\$).mp.                                                                                                                                                                   | 8319             |
| 9                                                                                 | 6 or 7 or 8                                                                                                                                                                                                    | 529782           |
| 10                                                                                | tomography, x-ray computed/or computed tomography angiography/or four-dimensional computed tomography/                                                                                                         | 355357           |
| 11                                                                                | ((electrocardiogra\$ or ECG\$) adj2 (gated or synchroni\$)).mp.                                                                                                                                                | 2710             |
| 12                                                                                | ((computer\$ adj2 (assisted or diagnos\$)) or CT scan\$ or ((positron or compute\$ or emission) adj3 tomograph\$) or tomoscintigra\$ or PET scan\$ or (CT adj2 (scan\$ or angiogra\$ or dual-energy))).mp.     | 849613           |
| 13                                                                                | 11 or 12                                                                                                                                                                                                       | 850311           |
| 14                                                                                | 10 or 13 [CT]                                                                                                                                                                                                  | 850311           |
| 15                                                                                | 9 or 14                                                                                                                                                                                                        | 1202294          |
| 16                                                                                | 5 and 15                                                                                                                                                                                                       | 3517             |
| 17                                                                                | limit 16 to English language                                                                                                                                                                                   | 3046             |
| 18                                                                                | limit 17 to yr = "2008-Current"                                                                                                                                                                                | 2210             |
| 19                                                                                | limit 18 to (comment or editorial or letter)                                                                                                                                                                   | 97               |
| 20                                                                                | 18 not 19                                                                                                                                                                                                      | 2113             |

**Table E5. EMBASE search strategy for question 1**

| Question 1: Is noninvasive imaging capable of identifying pulmonary hypertension? |                                                                               |                  |
|-----------------------------------------------------------------------------------|-------------------------------------------------------------------------------|------------------|
| Row                                                                               | Search terms                                                                  | Number citations |
| 1                                                                                 | hypertension, pulmonary/or familial primary pulmonary hypertension/           | 40563            |
| 2                                                                                 | ((pulmonary or lung) adj3 hypertensi\$).mp.                                   | 72621            |
| 3                                                                                 | (pulmonary adj2 (heart or vascular or arter\$ or cardiac) adj2 disease\$).mp. | 6051             |
| 4                                                                                 | (corpulmonale or cor pulmonale).mp.                                           | 2721             |
| 5                                                                                 | 1 or 2 or 3 or 4                                                              | 76921            |



|    |                                                                                                                                                                                                             |         |
|----|-------------------------------------------------------------------------------------------------------------------------------------------------------------------------------------------------------------|---------|
| 6  | exp nuclear magnetic resonance imaging/                                                                                                                                                                     | 774826  |
| 7  | ((MRI or MRIs or (magnet\$ adj2 (transfer or resonance) adj2 (tomogra\$ or imag\$ or angiogra\$)) or ((MR or NMR) adj imag\$)).mp.                                                                          | 797608  |
| 8  | (echo adj2 (planar or spin) adj2 imag\$).mp.                                                                                                                                                                | 8269    |
| 9  | 6 or 7 or 8                                                                                                                                                                                                 | 827600  |
| 10 | exp computer assisted tomography/                                                                                                                                                                           | 807433  |
| 11 | ((electrocardiogra\$ or ECG\$) adj2 (gated or synchroni\$)).mp.                                                                                                                                             | 3633    |
| 12 | ((computer\$ adj2 (assisted or diagnos\$)) or CT scan\$ or ((positron or compute\$ or emission) adj3 tomograph\$) or tomoscintigra\$ or PET scan\$ or (CT adj2 (scan\$ or angiogra\$ or duel-energy\$)).mp. | 956339  |
| 13 | 11 or 12                                                                                                                                                                                                    | 957338  |
| 14 | 10 or 13 [CT]                                                                                                                                                                                               | 960662  |
| 15 | 9 or 14                                                                                                                                                                                                     | 1549245 |
| 16 | 5 and 15                                                                                                                                                                                                    | 10802   |
| 17 | limit 16 to English language                                                                                                                                                                                | 10167   |
| 18 | limit 17 to yr = "2008-Current"                                                                                                                                                                             | 8908    |
| 19 | limit 18 to (conference abstract or editorial or erratum or letter or note)                                                                                                                                 | 3593    |
| 20 | 18 not 19                                                                                                                                                                                                   | 5315    |
| 21 | limit 20 to (adult < 18 to 64 years > or aged < 65+ years > )                                                                                                                                               | 3050    |

**Table E6. MEDLINE search strategy for question 2**

| Question 2: What is the role of imaging in establishing the cause of pulmonary hypertension? |                                                                                                                                                                                                             |                  |
|----------------------------------------------------------------------------------------------|-------------------------------------------------------------------------------------------------------------------------------------------------------------------------------------------------------------|------------------|
| Row                                                                                          | Search terms                                                                                                                                                                                                | Number citations |
| 1                                                                                            | hypertension, pulmonary/or familial primary pulmonary hypertension/                                                                                                                                         | 31863            |
| 2                                                                                            | ((pulmonary or lung) adj3 hypertensi\$).mp.                                                                                                                                                                 | 48909            |
| 3                                                                                            | (pulmonary adj2 (heart or vascular or arter\$ or cardiac) adj2 disease\$).mp.                                                                                                                               | 9781             |
| 4                                                                                            | (corpulmonale or cor pulmonale).mp.                                                                                                                                                                         | 4022             |
| 5                                                                                            | 1 or 2 or 3 or 4                                                                                                                                                                                            | 55890            |
| 6                                                                                            | tomography, x-ray computed/or computed tomography angiography/or four-dimensional computed tomography/                                                                                                      | 356201           |
| 7                                                                                            | ((electrocardiogra\$ or ECG\$) adj2 (gated or synchroni\$)).mp.                                                                                                                                             | 2713             |
| 8                                                                                            | ((computer\$ adj2 (assisted or diagnos\$)) or CT scan\$ or ((positron or compute\$ or emission) adj3 tomograph\$) or tomoscintigra\$ or PET scan\$ or (CT adj2 (scan\$ or angiogra\$ or duel-energy\$)).mp. | 851580           |
| 9                                                                                            | 7 or 8                                                                                                                                                                                                      | 852278           |
| 10                                                                                           | 6 or 9 [CT]                                                                                                                                                                                                 | 852278           |
| 11                                                                                           | radionuclide imaging/or radionuclide angiography/or exp radionuclide ventriculography/[Medline]                                                                                                             | 91107            |
| 12                                                                                           | (scintiscan\$ or scintillogr\$ or scintigra\$ or scintillation).mp.                                                                                                                                         | 59935            |
| 13                                                                                           | (radionuclide adj2 (imag\$ or angiogra\$ or ventriculogra\$)).mp.                                                                                                                                           | 92250            |
| 14                                                                                           | positron emission tomography computed tomography/or single photon emission computed tomography computed tomography/                                                                                         | 4654             |
| 15                                                                                           | 11 or 12 or 13 or 14                                                                                                                                                                                        | 129972           |
| 16                                                                                           | 10 or 15 [CT or Scintigraphy]                                                                                                                                                                               | 953886           |
| 17                                                                                           | 5 and 16 [PH and imaging]                                                                                                                                                                                   | 3366             |
| 18                                                                                           | (CTEPH or (((thromboemboli\$ or thrombo-emboli\$) adj2 (pulmonary adj2 hypertensi\$)) or disease\$ or chronic)).mp.                                                                                         | 6299745          |
| 19                                                                                           | pulmonary veno-occlusive disease/                                                                                                                                                                           | 758              |
| 20                                                                                           | ((lung or pulmonary) adj2 (venoocclusi\$ or veno-occlusi\$)).mp.                                                                                                                                            | 959              |
| 21                                                                                           | 19 or 20                                                                                                                                                                                                    | 959              |
| 22                                                                                           | (pulmonary adj2 capillary adj2 h\$emangiomatosis).mp.                                                                                                                                                       | 114              |
| 23                                                                                           | 18 or 21 or 22 [CTEPH or PVOD or PCH]                                                                                                                                                                       | 6299778          |
| 24                                                                                           | 17 and 23                                                                                                                                                                                                   | 2327             |
| 25                                                                                           | limit 24 to English language                                                                                                                                                                                | 1844             |
| 26                                                                                           | limit 25 to (comment or editorial or letter)                                                                                                                                                                | 37               |

|    |                                 |      |
|----|---------------------------------|------|
| 27 | 25 not 26                       | 1807 |
| 28 | limit 27 to yr = "2008-Current" | 1102 |

**Table E7. EMBASE search strategy for question 2**

| Question 2: What is the role of imaging in establishing the cause of pulmonary hypertension? |                                                                                                                                                                                                            |                  |
|----------------------------------------------------------------------------------------------|------------------------------------------------------------------------------------------------------------------------------------------------------------------------------------------------------------|------------------|
| Row                                                                                          | Search terms                                                                                                                                                                                               | Number citations |
| 1                                                                                            | hypertension, pulmonary/or familial primary pulmonary hypertension/                                                                                                                                        | 40747            |
| 2                                                                                            | ((pulmonary or lung) adj3 hypertensi\$).mp.                                                                                                                                                                | 72849            |
| 3                                                                                            | (pulmonary adj2 (heart or vascular or arter\$ or cardiac) adj2 disease\$).mp.                                                                                                                              | 6072             |
| 4                                                                                            | (corpulmonale or cor pulmonale).mp.                                                                                                                                                                        | 2724             |
| 5                                                                                            | 1 or 2 or 3 or 4 [PH]                                                                                                                                                                                      | 77162            |
| 6                                                                                            | exp computer assisted tomography/                                                                                                                                                                          | 810146           |
| 7                                                                                            | ((electrocardiogra\$ or ECG\$) adj2 (gated or synchroni\$)).mp.                                                                                                                                            | 3642             |
| 8                                                                                            | ((computer\$ adj2 (assisted or diagnos\$)) or CT scan\$ or ((positron or compute\$ or emission) adj3 tomograph\$) or tomoscintigra\$ or PET scan\$ or (CT adj2 (scan\$ or angiogra\$ or dual-energy))).mp. | 959285           |
| 9                                                                                            | 7 or 8                                                                                                                                                                                                     | 960287           |
| 11                                                                                           | 6 or 9 [CT]                                                                                                                                                                                                | 963626           |
| 12                                                                                           | scintigraphy/or computer assisted scintigraphy/or tomoscintigraphy/                                                                                                                                        | 19001            |
| 13                                                                                           | (scintiscan\$ or scintillogr\$ or scintigra\$ or scintillation).mp.                                                                                                                                        | 108196           |
| 14                                                                                           | (radionuclide adj2 (imag\$ or angiogra\$ or ventriculogra\$)).mp.                                                                                                                                          | 5568             |
| 15                                                                                           | 12 or 13 or 14 [Scintigraphy]                                                                                                                                                                              | 111090           |
| 16                                                                                           | 11 or 15 [CT or Scintigraphy]                                                                                                                                                                              | 1025987          |
| 17                                                                                           | 5 and 16 [PH and imaging]                                                                                                                                                                                  | 8567             |
| 18                                                                                           | chronic thromboembolic pulmonary hypertension/                                                                                                                                                             | 2742             |
| 19                                                                                           | (CTEPH or (((thromboemboli\$ or thrombo-emboli\$) adj2 (pulmonary adj2 hypertens\$)) or disease\$ or chronic)).mp.                                                                                         | 6863491          |
| 20                                                                                           | 18 or 19 [CTEPH]                                                                                                                                                                                           | 6863491          |
| 21                                                                                           | pulmonary veno-occlusive disease/                                                                                                                                                                          | 548              |
| 22                                                                                           | ((lung or pulmonary) adj2 (venoocclusi\$ or veno-occlusi\$)).mp.                                                                                                                                           | 683              |
| 23                                                                                           | 21 or 22                                                                                                                                                                                                   | 683              |
| 24                                                                                           | pulmonary capillary hemangiomatosis/                                                                                                                                                                       | 196              |
| 25                                                                                           | (pulmonary adj2 capillary adj2 h\$emangiomatosis).mp.                                                                                                                                                      | 248              |
| 26                                                                                           | 24 or 25 [PCH]                                                                                                                                                                                             | 248              |
| 27                                                                                           | 20 or 23 or 26 [CTEPH or PVOD or PCH]                                                                                                                                                                      | 6863522          |
| 28                                                                                           | 17 and 27                                                                                                                                                                                                  | 6859             |
| 29                                                                                           | limit 28 to English language                                                                                                                                                                               | 6357             |
| 30                                                                                           | limit 29 to yr = "2008-Current"                                                                                                                                                                            | 5450             |
| 31                                                                                           | limit 30 to (conference abstract or editorial or letter)                                                                                                                                                   | 1815             |
| 32                                                                                           | 30 not 31                                                                                                                                                                                                  | 3635             |

**Table E8. MEDLINE search strategy for question 3a**

| Question 3a: Can imaging determine the severity of pulmonary hypertension? |                                                                                                                                                                                                                |                  |
|----------------------------------------------------------------------------|----------------------------------------------------------------------------------------------------------------------------------------------------------------------------------------------------------------|------------------|
| Row                                                                        | Search terms                                                                                                                                                                                                   | Number citations |
| 1                                                                          | hypertension, pulmonary/or familial primary pulmonary hypertension/                                                                                                                                            | 31804            |
| 2                                                                          | ((pulmonary or lung) adj3 hypertensi\$).mp.                                                                                                                                                                    | 48785            |
| 3                                                                          | (pulmonary adj2 (heart or vascular or arter\$ or cardiac) adj2 disease\$).mp.                                                                                                                                  | 9773             |
| 4                                                                          | (corpulmonale or cor pulmonale).mp.                                                                                                                                                                            | 4020             |
| 5                                                                          | 1 or 2 or 3 or 4                                                                                                                                                                                               | 55766            |
| 6                                                                          | magnetic resonance imaging/or diffusion magnetic resonance imaging/or echo-planar imaging/or <sup>19</sup> F magnetic resonance imaging/or magnetic resonance angiography/or magnetic resonance imaging, cine/ | 396478           |

|    |                                                                                                                                                                                                            |         |
|----|------------------------------------------------------------------------------------------------------------------------------------------------------------------------------------------------------------|---------|
| 7  | (MRI or MRIs or (magnet\$ adj2 (transfer or resonance) adj2 (tomogra\$ or imag\$ or angiogra\$)) or ((MR or NMR) adj imag\$)).mp.                                                                          | 528834  |
| 8  | (echo adj2 (planar or spin) adj2 imag\$).mp.                                                                                                                                                               | 8319    |
| 9  | 6 or 7 or 8                                                                                                                                                                                                | 529782  |
| 10 | tomography, x-ray computed/or computed tomography angiography/or four-dimensional computed tomography/                                                                                                     | 355357  |
| 11 | ((electrocardiogra\$ or ECG\$) adj2 (gated or synchroni\$)).mp.                                                                                                                                            | 2710    |
| 12 | ((computer\$ adj2 (assisted or diagnos\$)) or CT scan\$ or ((positron or compute\$ or emission) adj3 tomograph\$) or tomoscintigra\$ or PET scan\$ or (CT adj2 (scan\$ or angiogra\$ or dual-energy))).mp. | 849613  |
| 13 | 11 or 12                                                                                                                                                                                                   | 850311  |
| 14 | 10 or 13 [CT]                                                                                                                                                                                              | 850311  |
| 15 | 9 or 14                                                                                                                                                                                                    | 1202294 |
| 16 | 5 and 15                                                                                                                                                                                                   | 3517    |
| 17 | limit 16 to English language                                                                                                                                                                               | 3046    |
| 18 | limit 17 to yr = "2008-Current"                                                                                                                                                                            | 2210    |
| 19 | limit 18 to (comment or editorial or letter)                                                                                                                                                               | 97      |
| 20 | 18 not 19                                                                                                                                                                                                  | 2113    |

**Table E9. EMBASE search strategy for question 3a**

| Question 3a: Can imaging determine the severity of pulmonary hypertension? |                                                                                                                                                                                                            |                  |
|----------------------------------------------------------------------------|------------------------------------------------------------------------------------------------------------------------------------------------------------------------------------------------------------|------------------|
| Row                                                                        | Search terms                                                                                                                                                                                               | Number citations |
| 1                                                                          | hypertension, pulmonary/or familial primary pulmonary hypertension/                                                                                                                                        | 40563            |
| 2                                                                          | ((pulmonary or lung) adj3 hypertensi\$).mp.                                                                                                                                                                | 72621            |
| 3                                                                          | (pulmonary adj2 (heart or vascular or arter\$ or cardiac) adj2 disease\$).mp.                                                                                                                              | 6051             |
| 4                                                                          | (corpulmonale or cor pulmonale).mp.                                                                                                                                                                        | 2721             |
| 5                                                                          | 1 or 2 or 3 or 4                                                                                                                                                                                           | 76921            |
| 6                                                                          | exp nuclear magnetic resonance imaging/                                                                                                                                                                    | 774826           |
| 7                                                                          | (MRI or MRIs or (magnet\$ adj2 (transfer or resonance) adj2 (tomogra\$ or imag\$ or angiogra\$)) or ((MR or NMR) adj imag\$)).mp.                                                                          | 797608           |
| 8                                                                          | (echo adj2 (planar or spin) adj2 imag\$).mp.                                                                                                                                                               | 8269             |
| 9                                                                          | 6 or 7 or 8                                                                                                                                                                                                | 827600           |
| 10                                                                         | exp computer assisted tomography/                                                                                                                                                                          | 807433           |
| 11                                                                         | ((electrocardiogra\$ or ECG\$) adj2 (gated or synchroni\$)).mp.                                                                                                                                            | 3633             |
| 12                                                                         | ((computer\$ adj2 (assisted or diagnos\$)) or CT scan\$ or ((positron or compute\$ or emission) adj3 tomograph\$) or tomoscintigra\$ or PET scan\$ or (CT adj2 (scan\$ or angiogra\$ or dual-energy))).mp. | 956339           |
| 13                                                                         | 11 or 12                                                                                                                                                                                                   | 957338           |
| 14                                                                         | 10 or 13 [CT]                                                                                                                                                                                              | 960662           |
| 15                                                                         | 9 or 14                                                                                                                                                                                                    | 1549245          |
| 16                                                                         | 5 and 15                                                                                                                                                                                                   | 10802            |
| 17                                                                         | limit 16 to English language                                                                                                                                                                               | 10167            |
| 18                                                                         | limit 17 to yr = "2008-Current"                                                                                                                                                                            | 8908             |
| 19                                                                         | limit 18 to (conference abstract or editorial or erratum or letter or note)                                                                                                                                | 3593             |
| 20                                                                         | 18 not 19                                                                                                                                                                                                  | 5315             |
| 21                                                                         | limit 20 to (adult < 18 to 64 years > or aged < 65+ years > )                                                                                                                                              | 3050             |

**Table E10. MEDLINE search strategy for question 3b**

| Question 3b: Can imaging determine the complications of pulmonary hypertension? |                                                                     |                  |
|---------------------------------------------------------------------------------|---------------------------------------------------------------------|------------------|
| Row                                                                             | Search terms                                                        | Number citations |
| 1                                                                               | hypertension, pulmonary/or familial primary pulmonary hypertension/ | 31804            |
| 2                                                                               | ((pulmonary or lung) adj3 hypertensi\$).mp.                         | 48785            |

|    |                                                                                                                                                                                                                |         |
|----|----------------------------------------------------------------------------------------------------------------------------------------------------------------------------------------------------------------|---------|
| 3  | (pulmonary adj2 (heart or vascular or arter\$ or cardiac) adj2 disease\$).mp.                                                                                                                                  | 9773    |
| 4  | (corpulmonale or cor pulmonale).mp.                                                                                                                                                                            | 4020    |
| 5  | 1 or 2 or 3 or 4                                                                                                                                                                                               | 55766   |
| 6  | magnetic resonance imaging/or diffusion magnetic resonance imaging/or echo-planar imaging/or <sup>19</sup> F magnetic resonance imaging/or magnetic resonance angiography/or magnetic resonance imaging, cine/ | 396478  |
| 7  | (MRI or MRIs or (magnet\$ adj2 (transfer or resonance) adj2 (tomogra\$ or imag\$ or angiogra\$) or ((MR or NMR) adj imag\$)).mp.                                                                               | 528834  |
| 8  | (echo adj2 (planar or spin) adj2 imag\$).mp.                                                                                                                                                                   | 8319    |
| 9  | 6 or 7 or 8                                                                                                                                                                                                    | 529782  |
| 10 | tomography, x-ray computed/or computed tomography angiography/or four-dimensional computed tomography/                                                                                                         | 355357  |
| 11 | ((electrocardiogra\$ or ECG\$) adj2 (gated or synchroni\$)).mp.                                                                                                                                                | 2710    |
| 12 | ((computer\$ adj2 (assisted or diagnos\$) or CT scan\$ or ((positron or compute\$ or emission) adj3 tomograph\$) or tomoscintigra\$ or PET scan\$ or (CT adj2 (scan\$ or angiogra\$ or dual-energy))).mp.      | 849613  |
| 13 | 11 or 12                                                                                                                                                                                                       | 850311  |
| 14 | 10 or 13 [CT]                                                                                                                                                                                                  | 850311  |
| 15 | radionuclide imaging/or radionuclide angiography/or exp radionuclide ventriculography/                                                                                                                         | 91075   |
| 16 | (scintiscan\$ or scintillogr\$ or scintigra\$ or scintillation).mp.                                                                                                                                            | 59891   |
| 17 | (radionuclide adj2 (imag\$ or angiogra\$ or ventriculogra\$)).mp.                                                                                                                                              | 92222   |
| 18 | positron emission tomography computed tomography/or single photon emission computed tomography computed tomography/                                                                                            | 4543    |
| 19 | 15 or 16 or 17 or 18                                                                                                                                                                                           | 129801  |
| 20 | 9 or 14 or 19                                                                                                                                                                                                  | 1300102 |
| 21 | 5 and 20                                                                                                                                                                                                       | 4207    |
| 22 | limit 21 to English language                                                                                                                                                                                   | 3493    |
| 23 | limit 22 to yr = "2008-Current"                                                                                                                                                                                | 2259    |
| 24 | limit 23 to (comment or editorial or letter)                                                                                                                                                                   | 99      |
| 25 | 22 not 24                                                                                                                                                                                                      | 2160    |

**Table E11. EMBASE search strategy for question 3b**

| Question 3b: Can imaging determine the complications of pulmonary hypertension? |                                                                                                                                                                                                           |                  |
|---------------------------------------------------------------------------------|-----------------------------------------------------------------------------------------------------------------------------------------------------------------------------------------------------------|------------------|
| Row                                                                             | Search terms                                                                                                                                                                                              | Number citations |
| 1                                                                               | hypertension, pulmonary/or familial primary pulmonary hypertension/                                                                                                                                       | 40563            |
| 2                                                                               | ((pulmonary or lung) adj3 hypertensi\$).mp.                                                                                                                                                               | 72621            |
| 3                                                                               | (pulmonary adj2 (heart or vascular or arter\$ or cardiac) adj2 disease\$).mp.                                                                                                                             | 6051             |
| 4                                                                               | (corpulmonale or cor pulmonale).mp.                                                                                                                                                                       | 2721             |
| 5                                                                               | 1 or 2 or 3 or 4                                                                                                                                                                                          | 76921            |
| 6                                                                               | exp nuclear magnetic resonance imaging/                                                                                                                                                                   | 774826           |
| 7                                                                               | (MRI or MRIs or (magnet\$ adj2 (transfer or resonance) adj2 (tomogra\$ or imag\$ or angiogra\$) or ((MR or NMR) adj imag\$)).mp.                                                                          | 797608           |
| 8                                                                               | (echo adj2 (planar or spin) adj2 imag\$).mp.                                                                                                                                                              | 8269             |
| 9                                                                               | 6 or 7 or 8                                                                                                                                                                                               | 827600           |
| 10                                                                              | exp computer assisted tomography/                                                                                                                                                                         | 807433           |
| 11                                                                              | ((electrocardiogra\$ or ECG\$) adj2 (gated or synchroni\$)).mp.                                                                                                                                           | 3633             |
| 12                                                                              | ((computer\$ adj2 (assisted or diagnos\$) or CT scan\$ or ((positron or compute\$ or emission) adj3 tomograph\$) or tomoscintigra\$ or PET scan\$ or (CT adj2 (scan\$ or angiogra\$ or dual-energy))).mp. | 956339           |
| 13                                                                              | 11 or 12                                                                                                                                                                                                  | 957338           |
| 14                                                                              | 10 or 13 [CT]                                                                                                                                                                                             | 960662           |
| 15                                                                              | scintigraphy/or computer assisted scintigraphy/or tomoscintigraphy/                                                                                                                                       | 18941            |
| 16                                                                              | (scintiscan\$ or scintillogr\$ or scintigra\$ or scintillation).mp.                                                                                                                                       | 107984           |
| 17                                                                              | (radionuclide adj2 (imag\$ or angiogra\$ or ventriculogra\$)).mp.                                                                                                                                         | 5556             |
| 18                                                                              | 15 or 16 or 17                                                                                                                                                                                            | 110869           |

|    |                                                                  |         |
|----|------------------------------------------------------------------|---------|
| 19 | 9 or 14 or 18                                                    | 1601521 |
| 20 | 5 and 19                                                         | 11305   |
| 21 | limit 20 to English language                                     | 10588   |
| 22 | limit 21 to yr = "2008-Current"                                  | 9181    |
| 23 | limit 22 to (conference abstract or editorial or letter or note) | 3732    |
| 24 | 22 not 23                                                        | 5449    |
| 25 | limit 24 to (adult < 18 to 64 years > or aged < 65+ years > )    | 3128    |

**Table E12. MEDLINE search strategy for question 4**

| Question 4: How should imaging be used to assess chronic thromboembolic pulmonary hypertension before treatment? |                                                                                                                                                                                                                |                  |
|------------------------------------------------------------------------------------------------------------------|----------------------------------------------------------------------------------------------------------------------------------------------------------------------------------------------------------------|------------------|
| Row                                                                                                              | Search terms                                                                                                                                                                                                   | Number citations |
| 1                                                                                                                | ((lung\$ or bronch\$ or pulmonary) adj2 (angiogra\$ or arteriogra\$)).mp.                                                                                                                                      | 4840             |
| 2                                                                                                                | magnetic resonance imaging/or diffusion magnetic resonance imaging/or echo-planar imaging/or <sup>19</sup> F magnetic resonance imaging/or magnetic resonance angiography/or magnetic resonance imaging, cine/ | 397232           |
| 3                                                                                                                | (MRI or MRIs or (magnet\$ adj2 (transfer or resonance) adj2 (tomogra\$ or imag\$ or angiogra\$)) or ((MR or NMR) adj imag\$)).mp.                                                                              | 529750           |
| 4                                                                                                                | (echo adj2 (planar or spin) adj2 imag\$).mp.                                                                                                                                                                   | 8328             |
| 5                                                                                                                | 2 or 3 or 4                                                                                                                                                                                                    | 530697           |
| 6                                                                                                                | tomography, x-ray computed/or computed tomography angiography/or four-dimensional computed tomography/                                                                                                         | 356065           |
| 7                                                                                                                | ((electrocardiogra\$ or ECG\$) adj2 (gated or synchroni\$)).mp.                                                                                                                                                | 2711             |
| 8                                                                                                                | ((computer\$ adj2 (assisted or diagnos\$)) or CT scan\$ or ((positron or compute\$ or emission) adj3 tomograph\$) or tomoscintigra\$ or PET scan\$ or (CT adj2 (scan\$ or angiogra\$ or dual-energy\$))).mp.   | 850915           |
| 9                                                                                                                | 7 or 8                                                                                                                                                                                                         | 851613           |
| 10                                                                                                               | 6 or 9 [CT]                                                                                                                                                                                                    | 851613           |
| 11                                                                                                               | (CTEPH or ((thromboemboli\$ or thrombo-emboli\$) adj2 (pulmonary adj2 hypertens\$)) or ((thromboemboli\$ or thrombo-emboli\$) adj2 (disease\$ or chronic\$))).mp.                                              | 7370             |
| 12                                                                                                               | 1 or 5 or 10                                                                                                                                                                                                   | 1206435          |
| 13                                                                                                               | 11 and 12                                                                                                                                                                                                      | 987              |
| 14                                                                                                               | limit 13 to yr = "2008-Current"                                                                                                                                                                                | 554              |
| 15                                                                                                               | limit 14 to (comment or editorial or letter)                                                                                                                                                                   | 11               |
| 16                                                                                                               | 14 not 15                                                                                                                                                                                                      | 543              |

**Table E13. EMBASE search strategy for question 4**

| Question 4: How should imaging be used to assess chronic thromboembolic pulmonary hypertension before treatment? |                                                                                                                                                                                                              |                  |
|------------------------------------------------------------------------------------------------------------------|--------------------------------------------------------------------------------------------------------------------------------------------------------------------------------------------------------------|------------------|
| Row                                                                                                              | Search terms                                                                                                                                                                                                 | Number citations |
| 1                                                                                                                | lung angiography/                                                                                                                                                                                            | 6438             |
| 2                                                                                                                | ((lung\$ or bronch\$ or pulmonary) adj2 (angiogra\$ or arteriogra\$)).mp.                                                                                                                                    | 8649             |
| 3                                                                                                                | 1 or 2                                                                                                                                                                                                       | 8649             |
| 4                                                                                                                | exp nuclear magnetic resonance imaging/                                                                                                                                                                      | 774826           |
| 5                                                                                                                | (MRI or MRIs or (magnet\$ adj2 (transfer or resonance) adj2 (tomogra\$ or imag\$ or angiogra\$)) or ((MR or NMR) adj imag\$)).mp.                                                                            | 797608           |
| 6                                                                                                                | (echo adj2 (planar or spin) adj2 imag\$).mp.                                                                                                                                                                 | 8269             |
| 7                                                                                                                | 4 or 5 or 6                                                                                                                                                                                                  | 827600           |
| 8                                                                                                                | exp computer assisted tomography/[Embase]                                                                                                                                                                    | 807433           |
| 9                                                                                                                | ((electrocardiogra\$ or ECG\$) adj2 (gated or synchroni\$)).mp.                                                                                                                                              | 3633             |
| 10                                                                                                               | ((computer\$ adj2 (assisted or diagnos\$)) or CT scan\$ or ((positron or compute\$ or emission) adj3 tomograph\$) or tomoscintigra\$ or PET scan\$ or (CT adj2 (scan\$ or angiogra\$ or dual-energy\$))).mp. | 956339           |
| 11                                                                                                               | 9 or 10                                                                                                                                                                                                      | 957338           |
| 12                                                                                                               | 8 or 11 [CT]                                                                                                                                                                                                 | 960662           |
| 13                                                                                                               | chronic thromboembolic pulmonary hypertension/                                                                                                                                                               | 2722             |
| 14                                                                                                               | (CTEPH or ((thromboemboli\$ or thrombo-emboli\$) adj2 (pulmonary adj2 hypertens\$)) or ((thromboemboli\$ or thrombo-emboli\$) adj2 (disease\$ or chronic\$))).mp.                                            | 9619             |

|    |                                                                  |         |
|----|------------------------------------------------------------------|---------|
| 15 | 13 or 14                                                         | 9619    |
| 16 | 3 or 7 or 12                                                     | 1551236 |
| 17 | 15 and 16                                                        | 2106    |
| 18 | limit 17 to English language                                     | 1913    |
| 19 | limit 18 to yr = "2008-Current"                                  | 1554    |
| 20 | limit 19 to (conference abstract or editorial or letter or note) | 707     |
| 21 | 19 not 20                                                        | 847     |

**Table E14. MEDLINE search strategy for question 5**

| Question 5: Should imaging be performed after treatment of chronic thromboembolic pulmonary hypertension? |                                                                                                                                                                 |                  |
|-----------------------------------------------------------------------------------------------------------|-----------------------------------------------------------------------------------------------------------------------------------------------------------------|------------------|
| Row                                                                                                       | Search terms                                                                                                                                                    | Number citations |
| 1                                                                                                         | (CTEPH or ((thromboemboli\$ or thrombo-emboli\$) adj2 (pulmonary adj2 hypertens\$)) or ((thromboemboli\$ or thrombo-emboli\$) adj2 (disease\$ or chronic))).mp. | 7362             |
| 2                                                                                                         | exp Angioplasty, Balloon/                                                                                                                                       | 51258            |
| 3                                                                                                         | ((balloon or transluminal or percutaneous) adj2 (arter\$ dilat\$ or angioplasty)).mp.                                                                           | 58103            |
| 4                                                                                                         | 2 or 3                                                                                                                                                          | 58103            |
| 5                                                                                                         | exp Endarterectomy/                                                                                                                                             | 14670            |
| 6                                                                                                         | surgery/or (surgery or surgical\$ or surgeries).tw.                                                                                                             | 1644262          |
| 7                                                                                                         | (end arteriecto\$ or thromboendarterecto\$ or endarterecto\$ or endarteriecto\$).mp.                                                                            | 19283            |
| 8                                                                                                         | 5 or 6 or 7                                                                                                                                                     | 1655279          |
| 9                                                                                                         | 4 or 8                                                                                                                                                          | 1701692          |
| 10                                                                                                        | 1 and 9                                                                                                                                                         | 2039             |
| 11                                                                                                        | limit 10 to English language                                                                                                                                    | 1653             |
| 12                                                                                                        | limit 11 to yr = "2008-Current"                                                                                                                                 | 1013             |
| 13                                                                                                        | limit 12 to (comment or editorial or letter)                                                                                                                    | 67               |
| 14                                                                                                        | 12 not 13                                                                                                                                                       | 946              |

**Table E15. EMBASE search strategy for question 5**

| Question 5: Should imaging be performed after treatment of chronic thromboembolic pulmonary hypertension? |                                                                                                                                                                 |                  |
|-----------------------------------------------------------------------------------------------------------|-----------------------------------------------------------------------------------------------------------------------------------------------------------------|------------------|
| Row                                                                                                       | Search terms                                                                                                                                                    | Number citations |
| 1                                                                                                         | chronic thromboembolic pulmonary hypertension/                                                                                                                  | 2722             |
| 2                                                                                                         | (CTEPH or ((thromboemboli\$ or thrombo-emboli\$) adj2 (pulmonary adj2 hypertens\$)) or ((thromboemboli\$ or thrombo-emboli\$) adj2 (disease\$ or chronic))).mp. | 9619             |
| 3                                                                                                         | percutaneous transluminal angioplasty/                                                                                                                          | 22703            |
| 4                                                                                                         | ((balloon or transluminal or percutaneous) adj2 (arter\$ dilat\$ or angioplasty)).mp.                                                                           | 47433            |
| 5                                                                                                         | 3 or 4                                                                                                                                                          | 47433            |
| 6                                                                                                         | exp Endarterectomy/                                                                                                                                             | 19598            |
| 7                                                                                                         | surgery/or (surgery or surgical\$ or surgeries).tw.                                                                                                             | 1764330          |
| 8                                                                                                         | (end arteriecto\$ or thromboendarterecto\$ or endarterecto\$ or endarteriecto\$).mp.                                                                            | 21407            |
| 9                                                                                                         | 6 or 7 or 8                                                                                                                                                     | 1776492          |
| 10                                                                                                        | 5 or 9                                                                                                                                                          | 1813416          |
| 11                                                                                                        | 1 or 2                                                                                                                                                          | 9619             |
| 12                                                                                                        | 10 and 11                                                                                                                                                       | 3218             |
| 13                                                                                                        | limit 12 to English language                                                                                                                                    | 2801             |
| 14                                                                                                        | limit 13 to yr = "2008-Current"                                                                                                                                 | 2277             |
| 15                                                                                                        | limit 14 to (conference abstract or editorial or letter or note)                                                                                                | 1177             |

## References

139. Bergemann R, Allsopp J, Jenner H, et al. High levels of healthcare utilization prior to diagnosis in idiopathic pulmonary arterial hypertension support the feasibility of an early diagnosis algorithm: the SPHInX project. *Pulm Circ* 2018;8(4):2045894018798613.
140. Swift AJ, Lu H, Uthoff J, et al. A machine learning cardiac magnetic resonance approach to extract disease features and automate pulmonary arterial hypertension diagnosis. *Eur Heart J Cardiovasc Imaging* 2020. 10.1093/ehjci/jeaa001. Published online January 30, 2020.
141. Melzig C, Wörz S, Egenlauf B, et al. Combined automated 3D volumetry by pulmonary CT angiography and echocardiography for detection of pulmonary hypertension. *Eur Radiol* 2019;29(11):6059–6068.
142. Dawes TJW, de Marvao A, Shi W, et al. Machine Learning of Three-dimensional Right Ventricular Motion Enables Outcome Prediction in Pulmonary Hypertension: A Cardiac MR Imaging Study. *Radiology* 2017;283(2):381–390.
