# Supplementary material
Source: HighWire-hosted journal article supplement (https://erj.ersjournals.com/content/57/1/2004455)
Supplement: inline-supplementary-material-2 [file inline-supplementary-material-2.pdf]

**Figure E1:** Contrast-enhanced CT examination of a 62 yr-old patient with fibrotic hypersensitivity pneumonitis and intermediate probability of pulmonary hypertension at echocardiography. **(a)** The widest diameter of the aorta: (thin arrow; 2.90 cm) and the widest diameter of the pulmonary artery trunk (thick arrow; 3.60 cm) perpendicular to its long axis are measured at the level of the bifurcation of the pulmonary trunk. **(b)** The pulmonary trunk/aorta ratio  $> 1$  reinforces the clinical suspicion of pulmonary hypertension in the context of fibrotic interstitial lung disease. Subsequent confirmation of precapillary pulmonary hypertension at right heart catheterization (mean pulmonary artery pressure PAPm: 47 mm Hg).

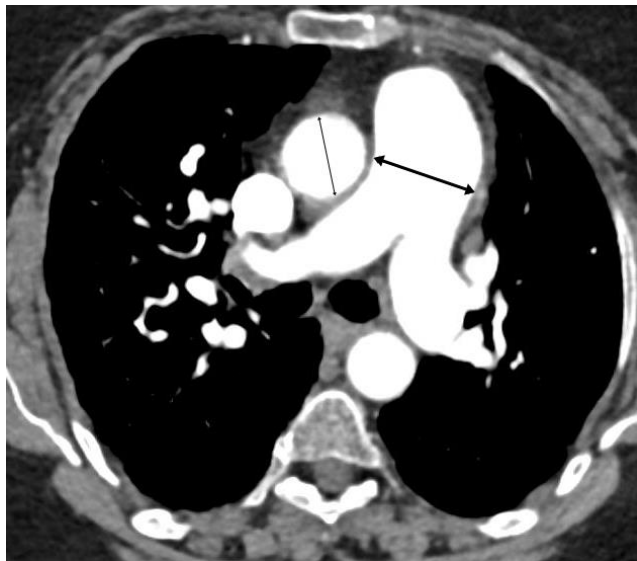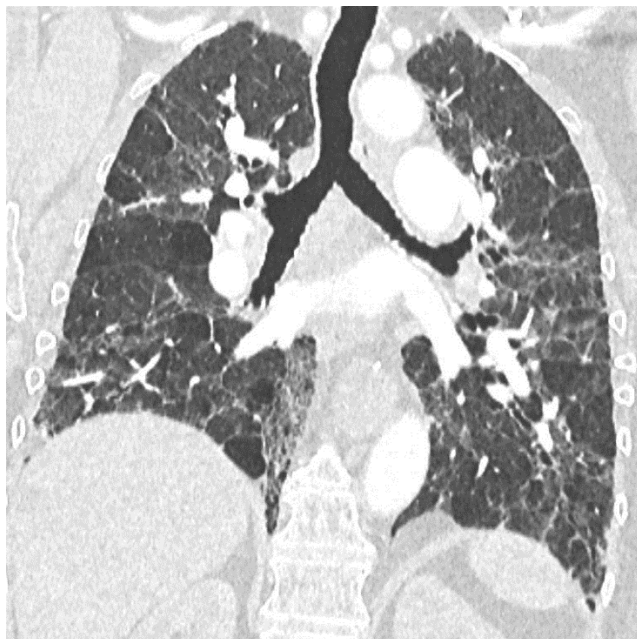

**Figure E2:** Contrast-enhanced CT examination of a 41-yr old female evaluated for severe precapillary pulmonary hypertension (mean pulmonary artery pressure PAPm: 58 mm Hg). **(a)** The widest diameter of the aorta (thin arrow; 2.70 cm) and the widest diameter of the pulmonary artery trunk (thick arrow; 2.70 cm) perpendicular to its long axis are measured at the level of the bifurcation of the pulmonary trunk. **(b)** A PA/aorta ratio = 1 does not exclude the presence of pulmonary hypertension. Absence of lung abnormality in this patient with a final diagnosis of pulmonary arterial hypertension.

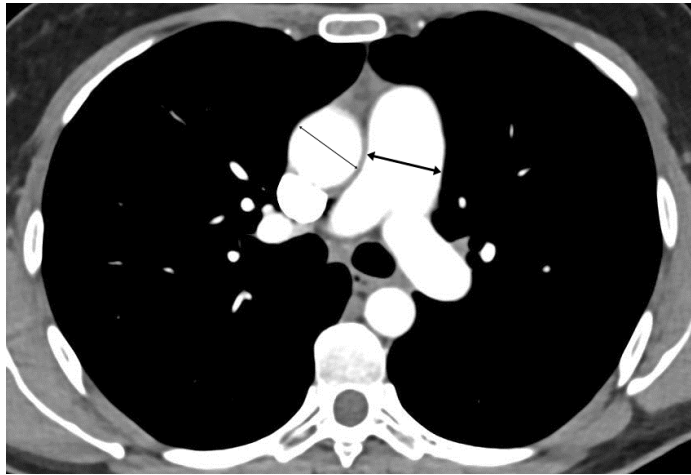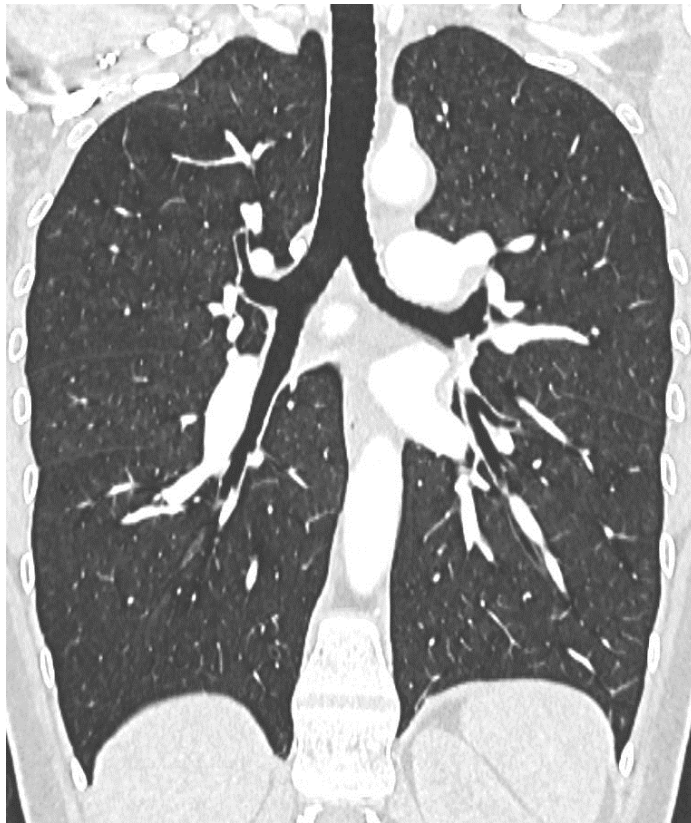

**Figure E3:** Flow diagram.

|                                                                                                                                                                                                                                       | 1. Is non-invasive imaging capable of identifying PH?                                            | 2. What is the role of imaging in establishing the cause of PH?                                 | 3a. Can imaging determine the severity of PH?                                                     | 3b. Can imaging identify the complications of PH?                                                 | 4. How should imaging be used to assess CTEPH before treatment?                               | 5a. Should imaging be performed after treatment of CTEPH?                                    |
|---------------------------------------------------------------------------------------------------------------------------------------------------------------------------------------------------------------------------------------|--------------------------------------------------------------------------------------------------|-------------------------------------------------------------------------------------------------|---------------------------------------------------------------------------------------------------|---------------------------------------------------------------------------------------------------|-----------------------------------------------------------------------------------------------|----------------------------------------------------------------------------------------------|
| <div>Pre-screen</div> <div>Excluded</div>                                                                                                                                                                                             | <div>5163</div> <div>1685</div>                                                                  | <div>4737</div> <div>3655</div>                                                                 | <div>5163</div> <div>3248</div>                                                                   | <div>5288</div> <div>3662</div>                                                                   | <div>1390</div> <div>326</div>                                                                | <div>2123</div> <div>863</div>                                                               |
| <div>Title review</div> <div>Excluded</div> <div>Not original</div> <div>Not human adults with PH</div> <div>&lt; 10 with PH</div> <div>Not relevant</div> <div>Not published in English</div>                                        | <div>3478</div> <div>381</div> <div>631</div> <div>460</div> <div>1347</div> <div>1</div>        | <div>1082</div> <div>77</div> <div>52</div> <div>98</div> <div>672</div> <div>1</div>           | <div>1915</div> <div>390</div> <div>35</div> <div>418</div> <div>447</div> <div>0</div>           | <div>1626</div> <div>360</div> <div>24</div> <div>374</div> <div>326</div> <div>0</div>           | <div>1064</div> <div>262</div> <div>26</div> <div>249</div> <div>383</div> <div>23</div>      | <div>1260</div> <div>389</div> <div>249</div> <div>95</div> <div>362</div> <div>0</div>      |
| <div>Abstract review</div> <div>Excluded</div> <div>Not original</div> <div>Not human adults with PH</div> <div>&lt; 10 with PH</div> <div>Not relevant</div> <div>Not published in English</div>                                     | <div>658</div> <div>105</div> <div>80</div> <div>34</div> <div>214</div> <div>0</div>            | <div>182</div> <div>43</div> <div>1</div> <div>8</div> <div>20</div> <div>0</div>               | <div>625</div> <div>63</div> <div>89</div> <div>20</div> <div>65</div> <div>0</div>               | <div>542</div> <div>37</div> <div>81</div> <div>14</div> <div>57</div> <div>0</div>               | <div>121</div> <div>0</div> <div>0</div> <div>1</div> <div>17</div> <div>0</div>              | <div>165</div> <div>5</div> <div>1</div> <div>9</div> <div>61</div> <div>0</div>             |
| <div>Full text review</div> <div>Excluded</div> <div>Not original</div> <div>Not human adults with PH</div> <div>&lt; 10 with PH</div> <div>Not relevant</div> <div>Not published in English</div> <div>Article not retrievable</div> | <div>225</div> <div>21</div> <div>16</div> <div>21</div> <div>43</div> <div>0</div> <div>6</div> | <div>110</div> <div>49</div> <div>3</div> <div>11</div> <div>17</div> <div>0</div> <div>4</div> | <div>388</div> <div>10</div> <div>22</div> <div>26</div> <div>190</div> <div>1</div> <div>5</div> | <div>353</div> <div>17</div> <div>21</div> <div>20</div> <div>176</div> <div>1</div> <div>4</div> | <div>103</div> <div>6</div> <div>3</div> <div>9</div> <div>40</div> <div>0</div> <div>0</div> | <div>89</div> <div>7</div> <div>0</div> <div>9</div> <div>27</div> <div>0</div> <div>2</div> |
| <div>Eligible</div>                                                                                                                                                                                                                   | <div>142</div>                                                                                   | <div>48</div>                                                                                   | <div>134</div>                                                                                    | <div>114</div>                                                                                    | <div>55</div>                                                                                 | <div>44</div>                                                                                |
