# Supplementary material
Source: HighWire-hosted journal article supplement (https://erj.ersjournals.com/content/57/1/2004455)
Supplement: inline-supplementary-material-3 [file inline-supplementary-material-3.pdf]

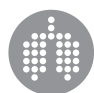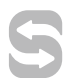

SHAREABLE PDF

# Imaging of pulmonary hypertension in adults: a position paper from the Fleischner Society

Martine Remy-Jardin<sup>1,18</sup>, Christopher J. Ryerson<sup>2</sup>, Mark L. Schiebler<sup>3</sup>, Ann N.C. Leung<sup>4</sup>, James M. Wild<sup>5</sup>, Marius M. Hoeper<sup>6</sup>, Philip O. Alderson<sup>7</sup>, Lawrence R. Goodman<sup>8</sup>, John Mayo<sup>9</sup>, Linda B. Haramati<sup>10</sup>, Yoshiharu Ohno<sup>11</sup>, Patricia Thistlethwaite<sup>12</sup>, Edwin J.R. van Beek<sup>13</sup>, Shandra Lee Knight<sup>14</sup>, David A. Lynch<sup>15</sup>, Geoffrey D. Rubin<sup>16</sup> and Marc Humbert<sup>17,19</sup>

**Affiliations:** <sup>1</sup>Dept of Thoracic Imaging, Hôpital Calmette, Boulevard Jules Leclercq, Lille, France. <sup>2</sup>Dept of Medicine, University of British Columbia and Centre for Heart Lung Innovation, St Paul's Hospital, Vancouver, BC, Canada. <sup>3</sup>Dept of Radiology, UW-Madison School of Medicine and Public Health, Madison, WI, USA. <sup>4</sup>Dept of Radiology, Stanford University Medical Center, Stanford, CA, USA. <sup>5</sup>Division of Imaging, Dept of Infection Immunity and Cardiovascular Disease, University of Sheffield, Sheffield, UK. <sup>6</sup>Dept of Respiratory Medicine, Hannover Medical School and German Centre of Lung Research (DZL), Hannover, Germany. <sup>7</sup>Dept of Radiology, Saint Louis University School of Medicine, St Louis, MO, USA. <sup>8</sup>Dept of Radiology, Medical College of Wisconsin, Milwaukee, WI, USA. <sup>9</sup>Dept of Radiology, Vancouver General Hospital, Vancouver, BC, Canada. <sup>10</sup>Dept of Radiology and Medicine, Montefiore Medical Center and Albert Einstein College of Medicine, Bronx, NY, USA. <sup>11</sup>Dept of Radiology, Fujita Health University School of Medicine, Toyoake, Japan. <sup>12</sup>Division of Cardiothoracic Surgery, University of California, San Diego, La Jolla, CA, USA. <sup>13</sup>Edinburgh Imaging, Queens Medical Research Institute, University of Edinburgh, Edinburgh, UK. <sup>14</sup>Dept of Library and Knowledge Services, National Jewish Health, Denver, CO, USA. <sup>15</sup>Dept of Radiology, National Jewish Health, Denver, CO, USA. <sup>16</sup>Dept of Radiology, Duke University School of Medicine, Durham, NC, USA. <sup>17</sup>Université Paris Saclay, Inserm UMR S999, Dept of Pneumology, AP-HP, Pulmonary Hypertension Reference Center, Hôpital de Bicêtre, Le Kremlin Bicêtre, France. <sup>18</sup>Chair of the Fleischner Society writing committee of the position paper for imaging of pulmonary hypertension. <sup>19</sup>Co-Chair of the Fleischner Society writing committee of the position paper for imaging of pulmonary hypertension.

**Correspondence:** Martine Remy-Jardin. E-mail: [martine.remy@chru-lille.fr](mailto:martine.remy@chru-lille.fr)

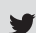

@ERSpublications

**From the Fleischner Society:** This systematic review and position paper highlights the key role of imaging in the recognition, work-up, treatment planning, and follow-up of pulmonary hypertension in adults <https://bit.ly/343kgbN>

**Cite this article as:** Remy-Jardin M, Ryerson CJ, Schiebler ML, *et al.* Imaging of pulmonary hypertension in adults: a position paper from the Fleischner Society. *Eur Respir J* 2021; 57: 2004455 [<https://doi.org/10.1183/13993003.04455-2020>].

This single-page version can be shared freely online.

**ABSTRACT** Pulmonary hypertension (PH) is defined by a mean pulmonary artery pressure greater than 20 mmHg and classified into five different groups sharing similar pathophysiologic mechanisms, haemodynamic characteristics, and therapeutic management. Radiologists play a key role in the multidisciplinary assessment and management of PH. A working group was formed from within the Fleischner Society based on expertise in the imaging and/or management of patients with PH, as well as experience with methodologies of systematic reviews. The working group identified key questions focusing on the utility of CT, MRI, and nuclear medicine in the evaluation of PH: *a)* Is noninvasive imaging capable of identifying PH? *b)* What is the role of imaging in establishing the cause of PH? *c)* How does imaging determine the severity and complications of PH? *d)* How should imaging be used to assess chronic thromboembolic PH before treatment? *e)* Should imaging be performed after treatment of PH? This systematic review and position paper highlights the key role of imaging in the recognition, work-up, treatment planning, and follow-up of PH.

© 2021 European Respiratory Society and RSNA. This article is a simultaneous joint publication in the *European Respiratory Journal* and *Radiology*. The articles are identical except for stylistic changes in keeping with each journal's style. Either version may be used in citing this article.
